# Supplementary material for: YELLOW ALERT: Persistent Yellow Fever Virus Circulation among Non-Human Primates in Urban Areas of Minas Gerais State, Brazil (2021–2023)
Source: MDPI journal article supplement (doi:10.3390/v16010031), 2023-12-23
Supplement: s1 [file s1]

**Table S1:** Primers and probe used in RT-qPCR

| Region  | Primer or probe | Sequence                               | Reference           |
|---------|-----------------|----------------------------------------|---------------------|
| β-actin | Forward primer  | 5' CCAACCGCGAGAAGATGA 3'               | Rezende et al, 2019 |
|         | Reverse primer  | 5' CCAGAGGCGTACAGGGATAG 3'             |                     |
| NS5     | All_S primer    | 5' TACAACATGATGGGGAARAGAGARAA 3'       | Patel et al, 2013   |
|         | All_S2 primer   | 5' GTGTCCCA GCCNGCKGTGTCATCWGC 3'      |                     |
| 5'UTR   | YFallF primer   | 5' GCTAATTGAGGTGYATTGGTCTGC 3'         | Domingo et al, 2012 |
|         | YFallR primer   | 5' CTGCTAATCGCTCAAMGAACG 3'            |                     |
|         | YFallP probe    | 5' FAM-ATCGAGTTGCTAGGCAATAAACAC-TMR 3' |                     |

Rezende, I.M.; Alves, P.A.; Arruda, M.S.; Gonçalves, A.P.; Oliveira, G.F.G.; Pereira, L.S.; Dutra, M.R.T.; Campi-Azevedo, A.C.; Valim, V.; Tourinho, R.; Oliveira, J.G.; Calzavara, C.E.; Said, R.F.D.C.; Kroon, E.G.; Martins-Filho, O.A.; Teixeira-Carvalho, A.; Drumond, B.P. Yellow Fever Virus Genotyping Tool and Investigation of Suspected Adverse Events Following Yellow Fever Vaccination. *Vaccines* **2019**, *7*, 1–10, doi:10.3390/vaccines7040206.

Domingo, C.; Patel, P.; Yillah, J.; Weidmann, M.; Méndez, J.A.; Nakouné, E.R.; Niedrig, M. Advanced Yellow Fever Virus Genome Detection in Point-of-Care Facilities and Reference Laboratories. *J. Clin. Microbiol.* **2012**, *50*, 4054–4060, doi:10.1128/JCM.01799-12.

Patel, P.; Landt, O.; Kaiser, M.; Faye, O.; Koppe, T.; Lass, U.; Sall, A.A.; Niedrig, M. Development of One-Step Quantitative Reverse Transcription PCR for the Rapid Detection of Flaviviruses. *Viol. J.* **2013**, *10*, 58, doi:10.1186/1743-422X-10-58.

Table S2: Non-human primate carcasses obtained from 2021 to 2023, Minas Gerais, Brazil, and tested for the presence of yellow fever virus RNA

| ID    | Date      | Season | Year | RTqPCR | Taxon                         | Area  | Municipality   | State mesoregion  |
|-------|-----------|--------|------|--------|-------------------------------|-------|----------------|-------------------|
| 1118  | 01-Feb-21 | rainy  | 2021 | neg    | <i>Callithrix penicillata</i> | Urban | Itaúna         | West              |
| 1119  | 03-Feb-21 | rainy  | 2021 | neg    | <i>Callithrix penicillata</i> | Urban | Nova Lima      | Metropolitan      |
| 1128  | 12-Feb-21 | rainy  | 2021 | pos    | <i>Callithrix penicillata</i> | Urban | Timóteo        | Rio Doce Valley   |
| 1140A | 18-Feb-21 | rainy  | 2021 | pos    | <i>Callithrix penicillata</i> | Urban | Igaratinga     | West              |
| 1138  | 04-Mar-21 | rainy  | 2021 | pos    | <i>Callithrix penicillata</i> | Urban | Jaboticatubas  | Metropolitan      |
| 1136  | 16-Mar-21 | rainy  | 2021 | pos    | <i>Callithrix penicillata</i> | Urban | Belo Horizonte | Metropolitan      |
| 1134  | 18-Mar-21 | rainy  | 2021 | pos    | <i>Callithrix penicillata</i> | Rural | Carmo Da Mata  | West              |
| 1122  | 30-Mar-21 | rainy  | 2021 | pos    | <i>Callithrix penicillata</i> | Urban | Belo Horizonte | Metropolitan      |
| 1132  | 23-Apr-21 | dry    | 2021 | pos    | <i>Callithrix penicillata</i> | Urban | Araguari       | Triangulo Mineiro |
| 1124  | 26-Apr-21 | dry    | 2021 | pos    | <i>Callithrix penicillata</i> | Rural | Curvelo        | Central           |
| 1130  | 10-May-21 | dry    | 2021 | pos    | <i>Callithrix penicillata</i> | Urban | Belo Horizonte | Metropolitan      |
| 1126  | 18-May-21 | dry    | 2021 | neg    | <i>Callithrix penicillata</i> | Urban | Belo Horizonte | Metropolitan      |
| 1141  | 26-May-21 | dry    | 2021 | neg    | <i>Callithrix penicillata</i> | Urban | Belo Horizonte | Metropolitan      |
| 1143  | 30-May-21 | dry    | 2021 | neg    | <i>Callithrix penicillata</i> | Urban | Belo Horizonte | Metropolitan      |
| 1145  | 30-May-21 | dry    | 2021 | neg    | <i>Callithrix penicillata</i> | Urban | Belo Horizonte | Metropolitan      |
| 1155  | 01-Jun-21 | dry    | 2021 | neg    | <i>Callithrix penicillata</i> | Urban | Itapajipe      | Triangulo Mineiro |
| 1165  | 01-Jun-21 | dry    | 2021 | neg    | <i>Alouatta spp.</i>          | Urban | Além Paraíba   | Zona da Mata      |
| 1169  | 08-Jun-21 | dry    | 2021 | neg    | <i>Callithrix penicillata</i> | Rural | Curvelo        | Central           |
| 1171  | 08-Jun-21 | dry    | 2021 | neg    | <i>Callithrix penicillata</i> | Urban | Bom Despacho   | Central           |
| 1149  | 17-Jun-21 | dry    | 2021 | neg    | <i>Callithrix penicillata</i> | Urban | Belo Horizonte | Metropolitan      |
| 1175  | 17-Jun-21 | dry    | 2021 | neg    | <i>Callithrix penicillata</i> | Urban | Belo Horizonte | Metropolitan      |
| 1151  | 23-Jun-21 | dry    | 2021 | neg    | <i>Callithrix penicillata</i> | Urban | Belo Horizonte | Metropolitan      |
| 1153  | 23-Jun-21 | dry    | 2021 | neg    | <i>Callithrix penicillata</i> | Urban | Belo Horizonte | Metropolitan      |
| 1147  | 25-Jun-21 | dry    | 2021 | neg    | <i>Callithrix penicillata</i> | Urban | Belo Horizonte | Metropolitan      |
| 1159  | 01-Jul-21 | dry    | 2021 | neg    | <i>Callithrix penicillata</i> | Urban | Belo Horizonte | Metropolitan      |

|      |           |       |      |     |                               |            |                    |                   |
|------|-----------|-------|------|-----|-------------------------------|------------|--------------------|-------------------|
| 1167 | 01-Jul-21 | dry   | 2021 | neg | <i>Callithrix geoffroyi</i>   | Urban      | Ipatinga           | Rio Doce Valley   |
| 1157 | 05-Jul-21 | dry   | 2021 | neg | <i>Callithrix penicillata</i> | Urban      | Belo Horizonte     | Metropolitan      |
| 1173 | 06-Jul-21 | dry   | 2021 | neg | <i>Callithrix penicillata</i> | Urban      | Ribeirão das Neves | Metropolitan      |
| 1163 | 10-Jul-21 | dry   | 2021 | neg | <i>Callithrix penicillata</i> | Urban      | Belo Horizonte     | Metropolitan      |
| 1181 | 12-Jul-21 | dry   | 2021 | neg | <i>Callithrix penicillata</i> | Urban      | Belo Horizonte     | Metropolitan      |
| 1189 | 14-Jul-21 | dry   | 2021 | neg | <i>Callithrix penicillata</i> | Urban      | Belo Horizonte     | Metropolitan      |
| 1177 | 15-Jul-21 | dry   | 2021 | neg | <i>Callithrix penicillata</i> | Rural      | Curvelo            | Central           |
| 1187 | 15-Jul-21 | dry   | 2021 | neg | <i>Callithrix penicillata</i> | Urban      | Curvelo            | Central           |
| 1191 | 15-Jul-21 | dry   | 2021 | neg | <i>Callithrix penicillata</i> | Urban      | Curvelo            | Central           |
| 1201 | 15-Jul-21 | dry   | 2021 | neg | <i>Callithrix penicillata</i> | Rural      | Curvelo            | Central           |
| 1197 | 23-Jul-21 | dry   | 2021 | neg | <i>Callithrix penicillata</i> | Rural      | Ubaí               | North             |
| 1205 | 04-Aug-21 | dry   | 2021 | pos | <i>Callithrix penicillata</i> | Urban      | Betim              | Metropolitan      |
| 1195 | 11-Aug-21 | dry   | 2021 | neg | <i>Callithrix penicillata</i> | Urban      | Belo Horizonte     | Metropolitan      |
| 1179 | 16-Aug-21 | dry   | 2021 | neg | <i>Callithrix penicillata</i> | Peri-urban | Nova Lima          | Metropolitan      |
| 1199 | 16-Aug-21 | dry   | 2021 | neg | <i>Callithrix penicillata</i> | Peri-urban | Nova Lima          | Metropolitan      |
| 1207 | 16-Aug-21 | dry   | 2021 | neg | <i>Callithrix penicillata</i> | Peri-urban | Nova Lima          | Metropolitan      |
| 1209 | 16-Aug-21 | dry   | 2021 | neg | <i>Callithrix penicillata</i> | Peri-urban | Nova Lima          | Metropolitan      |
| 1185 | 20-Aug-21 | dry   | 2021 | neg | <i>Callithrix penicillata</i> | Rural      | Sacramento         | Triangulo Mineiro |
| 1193 | 23-Aug-21 | dry   | 2021 | neg | <i>Callithrix penicillata</i> | Urban      | Belo Horizonte     | Metropolitan      |
| 1183 | 27-Aug-21 | dry   | 2021 | neg | <i>Callithrix penicillata</i> | Urban      | Santa Luzia        | Metropolitan      |
| 1203 | 01-Sep-21 | dry   | 2021 | neg | <i>Callithrix penicillata</i> | Urban      | Paraopeba          | Metropolitan      |
| 1217 | 09-Sep-21 | dry   | 2021 | neg | <i>Callithrix penicillata</i> | Rural      | Itaúna             | West              |
| 1215 | 15-Sep-21 | dry   | 2021 | neg | <i>Callithrix penicillata</i> | Urban      | Belo Horizonte     | Metropolitan      |
| 1213 | 23-Sep-21 | dry   | 2021 | neg | <i>Callithrix geoffroyi</i>   | NA         | Santana do Paraíso | Rio Doce Valley   |
| 1211 | 13-Oct-21 | rainy | 2021 | neg | <i>Cebidae</i>                | Rural      | Matozinhos         | Metropolitan      |
| 1227 | 21-Oct-21 | rainy | 2021 | neg | <i>Callithrix penicillata</i> | Urban      | Unaí               | Northwest         |
| 1224 | 28-Oct-21 | rainy | 2021 | neg | <i>Callithrix penicillata</i> | Urban      | Juiz de Fora       | Zona da Mata      |
| 1225 | 28-Oct-21 | rainy | 2021 | neg | <i>Callithrix penicillata</i> | Urban      | Juiz de Fora       | Zona da Mata      |
| 1219 | 29-Oct-21 | rainy | 2021 | neg | <i>Callithrix penicillata</i> | Urban      | Belo Horizonte     | Metropolitan      |
| 1230 | 21-Jan-22 | rainy | 2022 | neg | <i>Callithrix penicillata</i> | Urban      | Sarzedo            | Metropolitan      |

|      |           |       |      |     |                               |            |                    |                   |
|------|-----------|-------|------|-----|-------------------------------|------------|--------------------|-------------------|
| 1229 | 27-Jan-22 | rainy | 2022 | neg | <i>Callithrix geoffroyi</i>   | Urban      | Coronel Fabriciano | Rio Doce Valley   |
| 1231 | 18-Feb-22 | rainy | 2022 | neg | <i>Callithrix penicillata</i> | Urban      | Ponte Nova         | Zona da Mata      |
| 1233 | 03-Mar-22 | rainy | 2022 | neg | <i>Callithrix penicillata</i> | Urban      | Belo Horizonte     | Metropolitan      |
| 1232 | 04-Mar-22 | rainy | 2022 | neg | <i>Callithrix penicillata</i> | Urban      | Pará de Minas      | Metropolitan      |
| 1228 | 08-Mar-22 | rainy | 2022 | pos | <i>Callithrix penicillata</i> | Urban      | Belo Horizonte     | Metropolitan      |
| 1235 | 21-Mar-22 | rainy | 2022 | neg | <i>Callithrix penicillata</i> | Urban      | Belo Horizonte     | Metropolitan      |
| 1237 | 21-Mar-22 | rainy | 2022 | neg | <i>Callithrix penicillata</i> | Urban      | Papagaios          | Metropolitan      |
| 1236 | 23-Mar-22 | rainy | 2022 | neg | <i>Callithrix penicillata</i> | Urban      | Belo Horizonte     | Metropolitan      |
| 1239 | 23-Mar-22 | rainy | 2022 | neg | <i>Callithrix penicillata</i> | Urban      | Santa Luzia        | Metropolitan      |
| 1238 | 20-Apr-22 | dry   | 2022 | neg | <i>Callithrix penicillata</i> | Urban      | Itapajipe          | Triangulo Mineiro |
| 1240 | 27-Apr-22 | dry   | 2022 | neg | <i>Callithrix penicillata</i> | Urban      | Curvelo            | Central           |
| 1242 | 27-Apr-22 | dry   | 2022 | neg | <i>Callithrix penicillata</i> | Urban      | Jaboticatubas      | Metropolitan      |
| 1243 | 27-Apr-22 | dry   | 2022 | neg | <i>Callithrix penicillata</i> | Urban      | Jaboticatubas      | Metropolitan      |
| 1245 | 03-May-22 | dry   | 2022 | neg | <i>Callithrix penicillata</i> | Urban      | Coronel Fabriciano | Rio Doce Valley   |
| 1246 | 03-May-22 | dry   | 2022 | neg | <i>Callithrix geoffroyi</i>   | Urban      | Coronel Fabriciano | Rio Doce Valley   |
| 1247 | 03-May-22 | dry   | 2022 | neg | <i>Callithrix penicillata</i> | Urban      | Coronel Fabriciano | Rio Doce Valley   |
| 1244 | 23-May-22 | dry   | 2022 | neg | <i>Callithrix penicillata</i> | Urban      | Contagem           | Metropolitan      |
| 1248 | 25-May-22 | dry   | 2022 | neg | <i>Callithrix flaviceps</i>   | Urban      | Raul Soares        | Zona da Mata      |
| 1241 | 31-May-22 | dry   | 2022 | neg | <i>Callithrix geoffroyi</i>   | Urban      | Santana do Paraíso | Rio Doce Valley   |
| 1250 | 31-May-22 | dry   | 2022 | neg | <i>Callithrix penicillata</i> | Urban      | Itabirito          | Metropolitan      |
| 1252 | 14-Jun-22 | dry   | 2022 | neg | <i>Callithrix penicillata</i> | Rural      | Augusto de Lima    | Central           |
| 1249 | 17-Jun-22 | dry   | 2022 | neg | <i>Callithrix penicillata</i> | Peri-urban | Augusto de Lima    | Central           |
| 1251 | 17-Jun-22 | dry   | 2022 | neg | <i>Callithrix penicillata</i> | Peri-urban | Augusto de Lima    | Central           |
| 1253 | 20-Jun-22 | dry   | 2022 | neg | <i>Callithrix penicillata</i> | Peri-urban | Augusto de Lima    | Central           |
| 1268 | 20-Jun-22 | dry   | 2022 | neg | <i>Callithrix penicillata</i> | Peri-urban | Augusto de Lima    | Central           |
| 1271 | 20-Jun-22 | dry   | 2022 | neg | <i>Callithrix penicillata</i> | Urban      | Belo Horizonte     | Metropolitan      |
| 1266 | 21-Jun-22 | dry   | 2022 | neg | <i>Callithrix penicillata</i> | Peri-urban | Divinópolis        | West              |
| 1269 | 21-Jun-22 | dry   | 2022 | neg | <i>Callithrix penicillata</i> | Peri-urban | Divinópolis        | West              |
| 1263 | 22-Jun-22 | dry   | 2022 | neg | <i>Callithrix penicillata</i> | Urban      | Belo Horizonte     | Metropolitan      |
| 1265 | 23-Jun-22 | dry   | 2022 | neg | <i>Sapajus spp./Cebidae</i>   | Rural      | Raul Soares        | Zona da Mata      |

|      |           |       |      |     |                                   |       |                      |                   |
|------|-----------|-------|------|-----|-----------------------------------|-------|----------------------|-------------------|
| 1261 | 24-Jun-22 | dry   | 2022 | neg | <i>Callithrix penicillata</i>     | Urban | Contagem             | Metropolitan      |
| 1273 | 27-Jun-22 | dry   | 2022 | neg | <i>Callithrix penicillata</i>     | Urban | Ubaí                 | North             |
| 1257 | 28-Jun-22 | dry   | 2022 | neg | <i>Callithrix geoffroyi</i>       | Urban | Ipatinga             | Rio Doce Valley   |
| 1270 | 06-Jul-22 | dry   | 2022 | neg | <i>Callithrix penicillata</i>     | Urban | Betim                | Metropolitan      |
| 1256 | 07-Jul-22 | dry   | 2022 | neg | <i>Alouatta caraya</i>            | Urban | Unaí                 | Northwest         |
| 1255 | 08-Jul-22 | dry   | 2022 | neg | <i>Callithrix geoffroyi</i>       | Urban | Joanésia             | Rio Doce Valley   |
| 1254 | 11-Jul-22 | dry   | 2022 | neg | <i>Callithrix penicillata</i>     | Urban | Sete Lagoas          | Metropolitan      |
| 1264 | 11-Jul-22 | dry   | 2022 | neg | <i>Callithrix penicillata</i>     | Urban | Sete Lagoas          | Metropolitan      |
| 1262 | 12-Jul-22 | dry   | 2022 | neg | <i>Callithrix penicillata</i>     | Urban | Betim                | Metropolitan      |
| 1267 | 13-Jul-22 | dry   | 2022 | neg | <i>Callithrix penicillata</i>     | Urban | Augusto de Lima      | Central           |
| 1259 | 19-Jul-22 | dry   | 2022 | neg | <i>Callithrix penicillata</i>     | NA    | Diamantina           | Jequitinhonha     |
| 1260 | 20-Jul-22 | dry   | 2022 | neg | <i>Alouatta guariba clamitans</i> | rural | Santa Rita de Caldas | South/Southwest   |
| 1258 | 21-Jul-22 | dry   | 2022 | neg | <i>Callithrix penicillata</i>     | Urban | Belo Horizonte       | Metropolitan      |
| 1281 | 08-Aug-22 | dry   | 2022 | neg | <i>Callithrix penicillata</i>     | Urban | Belo Horizonte       | Metropolitan      |
| 1279 | 12-Aug-22 | dry   | 2022 | neg | <i>Callithrix penicillata</i>     | NA    | Itapajipe            | Triangulo Mineiro |
| 1275 | 17-Aug-22 | dry   | 2022 | neg | <i>Callithrix penicillata</i>     | NA    | Campo Belo           | West              |
| 1274 | 18-Aug-22 | dry   | 2022 | pos | <i>Callithrix penicillata</i>     | Urban | Belo Horizonte       | Metropolitan      |
| 1278 | 18-Aug-22 | dry   | 2022 | pos | <i>Callithrix penicillata</i>     | Urban | Belo Horizonte       | Metropolitan      |
| 1277 | 05-Sep-22 | dry   | 2022 | pos | <i>Callithrix penicillata</i>     | Urban | Belo Horizonte       | Metropolitan      |
| 1283 | 06-Sep-22 | dry   | 2022 | pos | <i>Callithrix penicillata</i>     | rural | Felixlândia          | Central           |
| 1276 | 08-Sep-22 | dry   | 2022 | pos | <i>Callithrix penicillata</i>     | Urban | Igarapé              | Metropolitan      |
| 1286 | 23-Sep-22 | dry   | 2022 | neg | <i>Sapajus spp./Cebidae</i>       | NA    | Caratinga            | Rio Doce Valley   |
| 1294 | 28-Sep-22 | dry   | 2022 | neg | <i>Callithrix penicillata</i>     | Urban | Brumadinho           | Metropolitan      |
| 1295 | 28-Sep-22 | dry   | 2022 | neg | <i>Callithrix penicillata</i>     | Urban | Brumadinho           | Metropolitan      |
| 1292 | 30-Sep-22 | dry   | 2022 | neg | <i>Callithrix geoffroyi</i>       | rural | Santana do Paraíso   | Rio Doce Valley   |
| 1293 | 04-Oct-22 | rainy | 2022 | neg | <i>Callithrix geoffroyi</i>       | Rural | São Pedro Do Suaçuí  | Rio Doce Valley   |
| 1296 | 05-Oct-22 | rainy | 2022 | neg | <i>Callithrix penicillata</i>     | Urban | Belo Horizonte       | Metropolitan      |
| 1284 | 06-Oct-22 | rainy | 2022 | neg | <i>Callithrix penicillata</i>     | Rural | Iraí de Minas        | Triangulo Mineiro |

|      |           |       |      |     |                                 |       |                    |                     |
|------|-----------|-------|------|-----|---------------------------------|-------|--------------------|---------------------|
| 1287 | 26-Oct-22 | rainy | 2022 | neg | <i>Callithrix penicillata</i>   | Urban | Nova Lima          | Metropolitan        |
| 1289 | 23-Nov-22 | rainy | 2022 | neg | <i>Callithrix penicillata</i>   | Urban | Lagoa Santa        | Metropolitan        |
| 1285 | 24-Nov-22 | rainy | 2022 | neg | <i>Callithrix penicillata</i>   | rural | São Francisco      | North               |
| 1290 | 24-Nov-22 | rainy | 2022 | neg | <i>Callithrix penicillata</i>   | rural | São Francisco      | North               |
| 1288 | 13-Dec-22 | rainy | 2022 | neg | <i>Sapajus spp./Cebidae</i>     | rural | Sacramento         | Triangulo Mineiro   |
| 1297 | 10-Jan-23 | rainy | 2023 | neg | <i>Alouatta fusca clamitans</i> | NA    | Angelândia         | Jequitinhonha       |
| 1300 | 16-Jan-23 | rainy | 2023 | neg | <i>Callithrix penicillata</i>   | NA    | Ribeirão Das Neves | Metropolitan        |
| 1301 | 17-Jan-23 | rainy | 2023 | neg | <i>Callithrix penicillata</i>   | NA    | Belo Horizonte     | Metropolitan        |
| 1298 | 20-Jan-23 | rainy | 2023 | neg | <i>Callithrix penicillata</i>   | NA    | Belo Horizonte     | Metropolitan        |
| 1299 | 31-Jan-23 | rainy | 2023 | neg | <i>Callithrix penicillata</i>   | NA    | Itapajipe          | Triangulo Mineiro   |
| 1307 | 31-Jan-23 | rainy | 2023 | neg | <i>Callithrix penicillata</i>   | NA    | Belo Horizonte     | Metropolitan        |
| 1308 | 31-Jan-23 | rainy | 2023 | neg | <i>Callithrix penicillata</i>   | NA    | Itapajipe          | Triangulo Mineiro   |
| 1313 | 31-Jan-23 | rainy | 2023 | neg | <i>Callithrix penicillata</i>   | NA    | Caxambu            | South/Southwest     |
| 1302 | 10-Feb-23 | rainy | 2023 | neg | <i>Callithrix penicillata</i>   | NA    | Nova Lima          | Metropolitan        |
| 1309 | 27-Feb-23 | rainy | 2023 | neg | <i>Callithrix penicillata</i>   | NA    | Contagem           | Metropolitan        |
| 1303 | 07-Mar-23 | rainy | 2023 | neg | <i>Callithrix penicillata</i>   | NA    | Contagem           | Metropolitan        |
| 1316 | 03-Apr-23 | dry   | 2023 | neg | <i>Callithrix penicillata</i>   | NA    | Itaúna             | West                |
| 1318 | 20-Apr-23 | dry   | 2023 | neg | <i>Callithrix geoffroyi</i>     | NA    | Coronel Fabriciano | Rio Doce Valley     |
| 1324 | 27-Apr-23 | dry   | 2023 | neg | <i>Sapajus spp./Cebidae</i>     | NA    | Marliéria          | Rio Doce Valley     |
| 1328 | 27-Apr-23 | dry   | 2023 | neg | <i>Sapajus spp./Cebidae</i>     | NA    | Marliéria          | Rio Doce Valley     |
| 1331 | 03-May-23 | dry   | 2023 | neg | <i>Callithrix penicillata</i>   | NA    | Rio Acima          | Metropolitan        |
| 1330 | 04-May-23 | dry   | 2023 | neg | <i>Callithrix geoffroyi</i>     | NA    | Mantena            | Rio Doce Valley     |
| 1322 | 17-May-23 | dry   | 2023 | neg | <i>Callithrix geoffroyi</i>     | NA    | Mantena            | Rio Doce Valley     |
| 1329 | 30-May-23 | dry   | 2023 | neg | <i>Callithrix penicillata</i>   | NA    | Belo Horizonte     | Metropolitan        |
| 1319 | 21-Jun-23 | dry   | 2023 | neg | <i>Callithrix geoffroyi</i>     | NA    | Marliéria          | Rio Doce Valley     |
| 1325 | 23-Jun-23 | dry   | 2023 | neg | <i>Callithrix penicillata</i>   | NA    | Belo Horizonte     | Metropolitan        |
| 1326 | 23-Jun-23 | dry   | 2023 | neg | <i>Callithrix penicillata</i>   | NA    | Barbacena          | Campo das Vertentes |
| 1327 | 23-Jun-23 | dry   | 2023 | neg | <i>Callithrix penicillata</i>   | NA    | Ibirité            | Metropolitan        |
| 1320 | 27-Jun-23 | dry   | 2023 | neg | <i>Callithrix penicillata</i>   | NA    | Marliéria          | Rio Doce Valley     |
| 1321 | 27-Jun-23 | dry   | 2023 | neg | <i>Callithrix geoffroyi</i>     | NA    | Belo Horizonte     | Metropolitan        |

|      |           |     |      |     |                               |    |                    |                 |
|------|-----------|-----|------|-----|-------------------------------|----|--------------------|-----------------|
| 1336 | 09-Aug-23 | dry | 2023 | neg | <i>Callithrix penicillata</i> | NA | Belo Horizonte     | Metropolitan    |
| 1334 | 14-Aug-23 | dry | 2023 | neg | <i>Callithrix penicillata</i> | NA | Ibirité            | Metropolitan    |
| 1333 | 16-Aug-23 | dry | 2023 | neg | <i>Callithrix geoffroyi</i>   | NA | Novo Cruzeiro      | Jequitinhonha   |
| 1332 | 17-Aug-23 | dry | 2023 | neg | <i>Callithrix penicillata</i> | NA | Jaboticatubas      | Metropolitan    |
| 1335 | 17-Aug-23 | dry | 2023 | neg | <i>Callithrix penicillata</i> | NA | Jaboticatubas      | Metropolitan    |
| 1161 | NA        | NA  | 2021 | neg | NA                            | NA | NA                 | NA              |
| 1221 | NA        | NA  | 2021 | neg | NA                            | NA | NA                 | NA              |
| 1223 | NA        | NA  | 2021 | neg | NA                            | NA | NA                 | NA              |
| 1234 | NA        | NA  | 2022 | neg | NA                            | NA | NA                 | NA              |
| 1272 | NA        | NA  | 2022 | neg | NA                            | NA | NA                 | NA              |
| 1280 | NA        | NA  | 2022 | pos | NA                            | NA | NA                 | NA              |
| 1282 | NA        | NA  | 2022 | pos | NA                            | NA | NA                 | NA              |
| 1291 | NA        | NA  | 2022 | neg | NA                            | NA | NA                 | NA              |
| 1304 | NA        | NA  | 2023 | neg | <i>Callithrix spp.</i>        | NA | Ibirité            | Metropolitan    |
| 1305 | NA        | NA  | 2023 | neg | <i>Callithrix spp.</i>        | NA | Belo Horizonte     | Metropolitan    |
| 1306 | NA        | NA  | 2023 | neg | <i>Callithrix spp.</i>        | NA | Belo Horizonte     | Metropolitan    |
| 1310 | NA        | NA  | 2023 | neg | <i>Callithrix spp.</i>        | NA | Belo Horizonte     | Metropolitan    |
| 1311 | NA        | NA  | 2023 | neg | <i>Callithrix spp.</i>        | NA | Belo Horizonte     | Metropolitan    |
| 1312 | NA        | NA  | 2023 | neg | <i>Callithrix spp.</i>        | NA | Matias Barbosa     | Zona da Mata    |
| 1314 | NA        | NA  | 2023 | neg | <i>Callithrix spp.</i>        | NA | Confins            | Metropolitan    |
| 1315 | NA        | NA  | 2023 | neg | <i>Callithrix spp.</i>        | NA | Belo Horizonte     | Metropolitan    |
| 1317 | NA        | NA  | 2023 | neg | <i>Callithrix spp.</i>        | NA | Santana Do Paraíso | Rio Doce Valley |
| 1323 | NA        | NA  | 2023 | neg | <i>Callithrix spp.</i>        | NA | Rio Acima          | Metropolitan    |

Neg: negative. Pos: positive. NA: not available.
